# Supplementary material for: Genetic Basis and Physiological Effects of Lipid A Hydroxylation in Pseudomonas aeruginosa PAO1
Source: MDPI journal article supplement (doi:10.3390/pathogens8040291), 2019-12-10
Supplement: s1 [file s1]

**Table S2.** Primers used in this study.<sup>a</sup>

| Primer name              | Sequence (5'→3') <sup>b</sup> | Restriction site | Application                      |
|--------------------------|-------------------------------|------------------|----------------------------------|
| <i>lpxO1_mut_UP_FW</i>   | ccgctcgaGTACCGAGGGAACGGCAG    | XhoI             | Generation of pDM4Δ <i>lpxO1</i> |
| <i>lpxO1_mut_UP_RV</i>   | cgggateCAGCGCATAGGCCGCCAG     | BamHI            |                                  |
| <i>lpxO1_mut_DOWN_FW</i> | cgggatCCGAACAACGCAGGCGAC      | BamHI            |                                  |
| <i>lpxO1_mut_DOWN_RV</i> | gctctAGATCTATGTCCAGGACCGC     | XbaI             |                                  |
| <i>lpxO2_mut_UP_FW</i>   | ccgctcgaGTCGACCTGGTTCTTGTGC   | XhoI             | Generation of pDM4Δ <i>lpxO2</i> |
| <i>lpxO2_mut_UP_RV</i>   | cgggatCCAGTTGGCGCAGGAAGG      | BamHI            |                                  |
| <i>lpxO2_mut_DOWN_FW</i> | cgggateCGGTCGCCATTTCGCGGC     | BamHI            |                                  |
| <i>lpxO2_mut_DOWN_RV</i> | gctctagAGAGGGTGACGAGGGTGC     | XbaI             |                                  |
| <i>lpxO1_pME6032_FW</i>  | cgggaatTCCTCTTTTGCACCGACGAC   | EcoRI            | Generation of pME <i>lpxO1</i>   |
| <i>lpxO1_pME6032_RV</i>  | ccgctcGAGCTATCGGGGCCTTGC      | XhoI             |                                  |
| <i>lpxO2_pME6032_FW</i>  | catgccatGGCCCCTGATATCGAAGGC   | NcoI             | Generation of pME <i>lpxO2</i>   |
| <i>lpxO2_pME6032_RV</i>  | ccgctcgaGAATCAGCCGAAGATCCAAC  | XhoI             |                                  |
| M13FW                    | GTTTCCAGTCACGAC               |                  | DNA sequencing                   |
| M13RV                    | CAGGAAACAGCTATGAC             |                  | DNA sequencing                   |

<sup>a</sup> PCRs were performed using the genomic DNA of *P. aeruginosa* PAO1 as the template.<sup>b</sup> The restriction site used for cloning is underlined in the primer sequence.
