# Supplementary material for: Genetic Basis and Physiological Effects of Lipid A Hydroxylation in Pseudomonas aeruginosa PAO1
Source: MDPI journal article supplement (doi:10.3390/pathogens8040291), 2019-12-10
Supplement: s1 [file s1]

**Table S1.** Bacterial strains and plasmids used in this study.

| Strain or plasmid                 | Genotype and/or relevant characteristics                                                                                                                                                | Reference or source              |
|-----------------------------------|-----------------------------------------------------------------------------------------------------------------------------------------------------------------------------------------|----------------------------------|
| <b><i>P. aeruginosa</i></b>       |                                                                                                                                                                                         |                                  |
| PAO1 (ATCC15692)                  | Prototroph                                                                                                                                                                              | American type culture collection |
| $\Delta lpxO1$                    | PAO1 derivative with an in-frame deletion in the <i>lpxO1</i> (PA4512) coding sequence                                                                                                  | This work                        |
| $\Delta lpxO2$                    | PAO1 derivative with an in-frame deletion in the <i>lpxO2</i> (PA0936) coding sequence                                                                                                  | This work                        |
| $\Delta lpxO1\Delta lpxO2$        | $\Delta lpxO1$ derivative with an in-frame deletion in the <i>lpxO2</i> coding sequence                                                                                                 | This work                        |
| <b><i>E. coli</i></b>             |                                                                                                                                                                                         |                                  |
| S17.1 $\lambda$ pir               | <i>thi pro hsdRhsdM<sup>+</sup> recA RP4-2-Tc::Mu-Km::Tn7 <math>\lambda</math>pir, Sm<sup>R</sup></i>                                                                                   | Simon <i>et al.</i> 1983         |
| <b>Plasmid</b>                    |                                                                                                                                                                                         |                                  |
| pBluescript II (pBS)              | Sequencing vector; ColE1 replicon; Ap <sup>R</sup>                                                                                                                                      | Stratagene                       |
| pBS <i>lpxO1</i> ↑ <i>lpxO1</i> ↓ | pBS derivative containing the regions upstream and downstream of the <i>lpxO1</i> coding sequence                                                                                       | This work                        |
| pBS <i>lpxO2</i> ↑ <i>lpxO2</i> ↓ | pBS derivative containing the regions upstream and downstream of the <i>lpxO1</i> coding sequence                                                                                       | This work                        |
| pDM4                              | Suicide vector; <i>sacBR</i> , <i>oriR6K</i> ; Cm <sup>R</sup>                                                                                                                          | Milton <i>et al.</i> 1996        |
| pDM4 $\Delta lpxO1$               | pDM4 derivative for <i>lpxO1</i> in-frame deletion, generated by sub-cloning the <i>lpxO1</i> ↑ <i>lpxO1</i> ↓ fragment of pBS <i>lpxO1</i> ↑ <i>lpxO1</i> ↓ into pDM4, Cm <sup>R</sup> | This work                        |
| pDM4 $\Delta lpxO2$               | pDM4 derivative for <i>lpxO2</i> in-frame deletion, generated by sub-cloning the <i>lpxO2</i> ↑ <i>lpxO2</i> ↓ fragment of pBS <i>lpxO2</i> ↑ <i>lpxO2</i> ↓ into pDM4, Cm <sup>R</sup> | This work                        |
| pME6032                           | Shuttle vector for IPTG inducible expression in <i>P. aeruginosa</i> , Tc <sup>R</sup>                                                                                                  | Heeb <i>et al.</i> 2002          |
| pME <i>lpxO1</i>                  | pME6032 derivative carrying the <i>lpxO1</i> coding sequence under the control of the IPTG-inducible promoter                                                                           | This work                        |
| pME <i>lpxO2</i>                  | pME6032 derivative carrying the <i>lpxO2</i> coding sequence under the control of the IPTG-inducible promoter                                                                           | This work                        |

Reference non included in the main text:

Simon, R.; Priefer, U; Pühler, A. A broad host range mobilization system for *in vivo* genetic engineering: transposon mutagenesis in Gram negative bacteria. *Bio/Technology*. **1983**, *1*, 784-790.
